# Supplementary material for: Conservative treatment for urinary fistula following ileal conduit urinary diversion: a simple method
Source: Springer Nature journal article supplement (doi:10.1186/s12894-019-0564-3), 2019-12-01

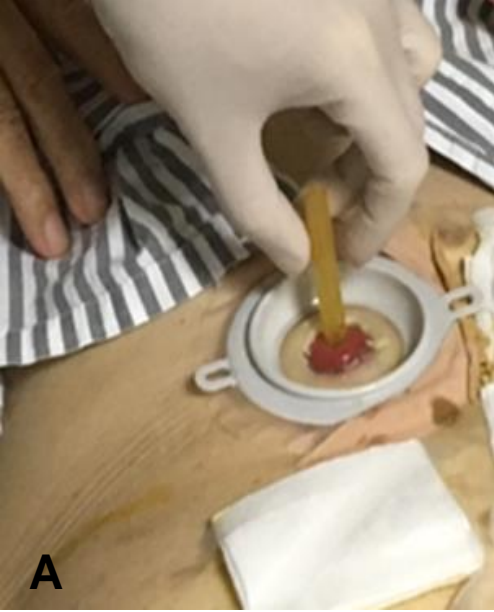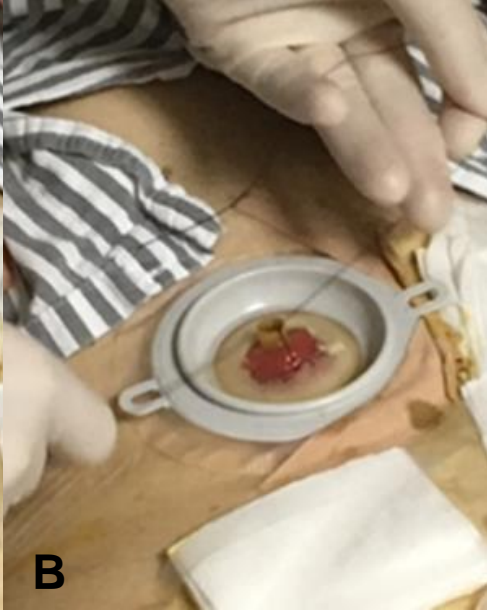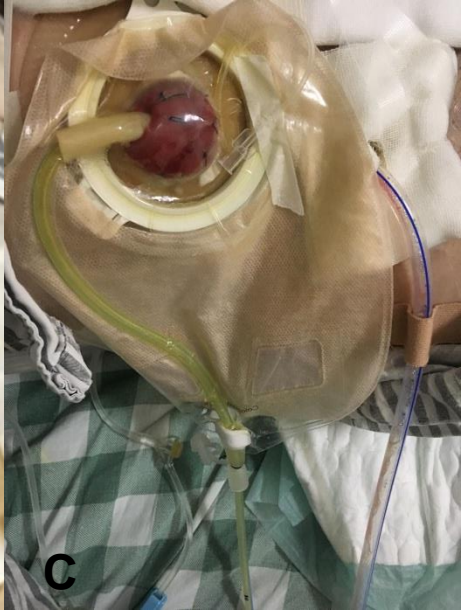

Supplement: MOESM1 [file 17490590]
